# Simulation scalability of large brain neuronal networks thanks to time asynchrony

Cyrille Mascart<sup>a,1</sup>, Gilles Scarella<sup>b,a</sup>, Patricia Reynaud-Bouret<sup>b</sup>, and Alexandre Muzy<sup>a</sup>

<sup>a</sup>Université Côte d'Azur, CNRS, I3S, France.; <sup>b</sup>Université Côte d'Azur, CNRS, LJAD, France.

This manuscript was compiled on June 11, 2021

**We present here a new algorithm based on a random model for simulating efficiently large brain neuronal networks. Model parameters (mean firing rate, number of neurons, synaptic connection probability and postsynaptic duration) are easy to calibrate further on real data experiments. Based on time asynchrony assumption, both computational and memory complexities are proved to be theoretically linear with the number of neurons. These results are experimentally validated by sequential simulations of millions of neurons and billions of synapses in few minutes on a single processor desktop computer.**

Brain neuronal networks | Random models | Point processes | Stochastic simulation | Discrete event systems | Time asynchrony | Hawkes processes.

There are more and more vast research projects, whose aim is to simulate brain areas or even complete brains to better understand the way it works. Let us cite for instance: the Human Brain Project (1) in Europe, the Brain Mapping by Integrated Neurotechnologies for Disease Studies (Brain/MINDS) (2) in Japan or the Brain Initiative (3) in the United-States. Several approaches are feasible. There is the biochemical approach (4), which is doomed for systems as complex as the brain. A more biophysical approach has been investigated, see for instance (5), where cortical barrels have been successfully simulated, but are limited to about  $10^5$  neurons. However, the human brain contains about  $10^{11}$  neurons whereas a small monkey, like marmosets (2), has already  $6 \times 10^8$  neurons (6) and a bigger monkey, like a macaque, has  $6 \times 10^9$  neurons (6).

To simulate such huge networks, models reduction have to be made. In particular, a neuron has no more physical shape and is just represented by a point in a network with a certain voltage. Hodgkin-Huxley equations (7) are able to reproduce the physical shape if it is combined to other differential equations, representing the dynamic of ion channels, but the complexity of these coupled equations that form a chaotic system (8), makes the system quite difficult to simulate for huge networks. If ion channels dynamic is neglected, the simplest model of voltage is the Integrate-and-Fire model (9). With such models, it has been possible on supercomputers to simulate a human-scale cerebellar network reaching about  $68 \times 10^9$  neurons (10).

However there is another point of view, which might allow us to simulate such massive networks with simplified models. Indeed, one can use much more random models to reproduce the essential dynamics of the neurons: their firing pattern. The randomization of not only the connectivity graph but also the dynamics on the graph is making the model closer to the data at hand and explain to a certain extent their variability. The introduction of randomness is not new and has been done in many models including Hodgkin-Huxley (11) and Leaky

Integrate-and-fire (LIF for short) (12).

Here we want to focus on particular random models - point processes (13) - which have a particular property: time asynchrony, that is the inability of the model to have two spikes that are produced exactly at the same time by two different neurons. This includes in particular Hawkes models and variants such as GLM, Wold processes, Galves-Löcherbach models, and even some random LIF models with random or soft threshold, all of them having been used to fit real data (13–19).

This property, which is well known in mathematics (14, 20), combined with graph sparsity lead us to propose a new algorithm in (21). The computational complexity of this new algorithm has been computed. Thanks to time asynchrony and to the computational activity tracking of firing neurons (22), we have shown in particular that if the graph is sparse, the complexity cost of the computation of a new point in the system is linear in the number of neurons. However the memory burden was too high to reach networks of  $10^8$  neurons.

In a preliminary work (23) focusing on the mathematical aspects of mean-field limits of LIFs, we formalized a way to deal with this memory aspect without putting it into practice: the main point is to not keep in memory the whole network, but to regenerate it when need be. Recently, the same idea, under the name of procedural connectivity, has been applied with success on LIF models in (24): using GPU-based parallel programming, and without time asynchrony, the authors have been able to simulate a network of  $4 \times 10^6$  neurons and  $24 \times 10^9$  synapses on a desktop GPU computer.

But, as we show in the present article, the gain of procedural connectivity is even huger when combined with time

## Significance Statement

Time asynchrony refers to models that prevent any two neurons to fire at the exact same time (up to the numerical precision). Brain models that are time asynchronous have a huge numerical advantage on other ones: they can be easily simulated without huge parallelization or use of GPU. Indeed, this work proposes to exploit the time asynchrony property to derive new simulation algorithms, whose computational and memory complexity can be estimated beforehand. Application on realistic set of parameters show that they can indeed easily reach the size of a small monkey brain, on a usual single processor desktop computer.

Please provide details of author contributions here.

Please declare any competing interests here.

<sup>1</sup> A.O. (Author One) contributed equally to this work with A.T. (Author Two) (remove if not applicable).

<sup>2</sup> To whom correspondence should be addressed. E-mail: author.twoemail.com

69 asynchrony. Indeed, classical parallel programming usually  
70 uses a discrete simulation time and computes for all neurons  
71 (or synapses) what happens at each time step in a parallel  
72 fashion (even if spikes can be communicated in between two  
73 time steps (10)). At each time step, each process correspond-  
74 ing to a different neuron has to wait for the calculations of  
75 all the other processes to know what needs to be updated  
76 before computing the next step. With time asynchrony, we  
77 can leverage discrete-event programming (25–28) to track the  
78 whole system in time by jumps: from one spike in the net-  
79 work to another spike in the network. Since a very small  
80 percentage of a brain is firing during a given unit of time  
81 (29), the gain we have is tremendous in terms of computations.  
82 Thanks to the procedural connectivity, the memory needed  
83 to access for the computation of each new spike is also con-  
84 trolled. Hence, thanks to procedural connectivity combined  
85 with time asynchrony, we propose a new algorithm for time  
86 asynchronous models, running sequentially on a single pro-  
87 cessor, thus simulating a realistic network of  $10^8$  neurons for  
88 which computational complexity as well as memory costs can  
89 be controlled beforehand.

## 90 Results

91 **Time synchrony for parallel simulation.** Brain simulation of  
92 large networks is usually done in parallel based on simulation  
93 synchronization. Of course, this depends on both the mathe-  
94 matical model at hand and the simulation algorithm. However,  
95 for most models, differential equations are used to derive the  
96 time course of the membrane voltage for each individual neu-  
97 rons. These equations are (approximately) solved by usual  
98 discrete-time numerical schemes (*cf.* Figure 1a) (24).

99 In this kind of implementation, when one presynaptic neu-  
100 ron fires at a time  $t$ , *i.e.*, emits a spike (red dots in Figure  
101 1a), the synaptic transmission to post-synaptic neurons is  
102 done at the next time step  $t + \Delta t$  (orange dots in Figure 1a).  
103 Between two synaptic transmissions, the membrane potential  
104 of a neuron evolves independently of the other neurons and  
105 can be computed in parallel (green dots in Figure 1a). How-  
106 ever, since one does not know when a spike will be emitted  
107 in the network in advance, the membrane potential of all the  
108 neurons are classically computed in a synchronous way to be  
109 able to eventually transmit spikes, at each time step  $\Delta t$  of the  
110 algorithm.

111 **Time asynchrony for sequential simulation.** As said in the in-  
112 troduction, point processes models of neuronal network may  
113 guarantee time asynchrony if they have a stochastic intensity.  
114 Such processes include Hawkes processes, GLM approaches,  
115 Wold processes or Galvès Löcherbach models in continuous  
116 time (13, 15–18). Most of these models have proved their  
117 efficiency in terms of goodness-of-fit with respect to real spike  
118 train data (13–17, 30). Often, the intensity in these models  
119 can be informally interpreted as a function of the membrane  
120 voltage and for more evidence, we refer the reader to (31),  
121 where the spike train of a motor neuron has been shown to  
122 be adequately modeled by a point process whose stochastic  
123 intensity is a function of the membrane voltage.

124 These point processes models differ from classical LIF,  
125 mainly because the higher the intensity (or the membrane  
126 potential) of a given neuron is, the more likely it is that the  
127 neuron fires, but this is never for sure. In classical LIF models,

128 the neurons fire when their membrane potential reaches a fixed  
129 threshold. Therefore it may happen that if a presynaptic neu-  
130 ron fires, and if the corresponding postsynaptic neurons have  
131 a potential close to the threshold, then all the postsynaptic  
132 neurons fire at the exact same time. This phenomenon can  
133 be massive (32, 33): this corresponds to the mathematical  
134 phenomenon of blow-up, which happens for some mean-field  
135 limits of such models. In this case, no time asynchrony is  
136 possible but such phenomenon is completely unrealistic from  
137 a biological point of view. There are LIF models with random  
138 or soft threshold (19, 23) which might not have this problem  
139 and which may also satisfy time asynchrony.

140 In (21), we proposed a discrete-event algorithm to simulate  
141 point processes with stochastic intensities. This algorithm is  
142 based on the theory of local independence graph (34), which  
143 is the directed neuronal network in our present case.

144 The algorithm works as follows (see Figure 1b). The spike  
145 events happen in continuous time in the system (up to the  
146 numerical precision). Once a spike on a particular presynaptic  
147 neuron happens (red dots in Figure 1b), the postsynaptic  
148 neurons are updated (orange dots in Figure 1b). The presy-  
149 naptic and the post synaptic neurons compute their intensities  
150 (assimilated to membrane potential) and forecast its evolution  
151 (green arrows in Figure 1b) if nothing in between occurs in  
152 the system. They are therefore able to forecast their potential  
153 next spike (gray dots in Figure 1b). The algorithm maintains  
154 a scheduler containing all potential next spikes on all neurons  
155 and decides that the next neuron to fire effectively is the one  
156 corresponding to the minimum of these potential next spikes.  
157 For more details, we refer to (21).

158 The gain comes from the fact that neurons that are not  
159 firing a lot, do not require a lot of computation either. In  
160 particular we do not have to update all neurons at each spike  
161 but only the pre and post synaptic neurons that are involved in  
162 the spiking event. This is the main difference with the parallel  
163 simulation framework detailed above. The other difference  
164 is that we can work with arbitrary precision, typically  $10^{-15}$   
165 if necessary, without impeding the time complexity of the  
166 algorithm.

167 Note that the whole algorithm is possible only because  
168 two neurons in the network will not spike at the same time:  
169 the whole concept is based on time asynchrony to be able to  
170 jump from one spike in the system to the next spike in the  
171 system. Of course, this is true only up to numerical precision:  
172 if two potential next spikes (gray dots on Figure 1b) happen  
173 at the exact same time with resolution  $10^{-15}$ , by convention  
174 the neuron with the smaller index is said to fire. But the  
175 probability of such event is so small that this is not putting  
176 the simulation in jeopardy.

177 Also note that this does not prevent neurons to eventually  
178 synchronize frequently over a small time duration of a few  
179 milliseconds, as defined for instance in (35) and the references  
180 therein.

181 **Procedural connectivity.** One of the memory burden of both  
182 methods (parallel and time asynchrony) comes from the fact  
183 that a classic implementation stores the whole connectivity  
184 graph, which is huge for brain scale models.

185 If the connectivity is the result of a random graph and  
186 that each presynaptic neuron is randomly connected to its  
187 postsynaptic neurons, one can store the random seed instead  
188 of the result of the random attribution. Hence the whole

189 graph is never stored in full but only regenerated when need  
 190 be (see Figure 1b). The random connectivity is regenerated  
 191 at each spike taking advantage of the deterministic nature of  
 192 the pseudo-random generator used in the simulation. Storing  
 193 the generator initial seed, the seed of each neuron is computed  
 194 based on initial seed value and neuron index (see Figure 1c).  
 195 With this method, only the initial seed is stored in memory.  
 196 Of course this dynamic regeneration at each spike has a cost  
 197 in terms of time complexity, but this cost is negligible with  
 198 respect to the other computations that need to be made and  
 199 this saves memory.

200 This method has been evoked at first in (23) for time asyn-  
 201 nchronous algorithms, without being put into practice, whereas  
 202 this method has been already implemented with success on  
 203 parallel programming with GPU (24).

204 **Computational and memory costs.** In (21), we obtained an  
 205 accurate estimate of the complexity of the algorithm without  
 206 procedural connectivity, for the simulation of linear Hawkes  
 207 processes (*cf.* Equation 7 of (21)). This can be reused to  
 208 compute the computational complexity of the same model,  
 209 when the procedural connectivity step is added. Thus the  
 210 overall time complexity of our algorithm is of the order of

$$211 \quad \mathcal{O}(T [Md^2\bar{m}^2 + \log(M)Md\bar{m} + Md\bar{m}]) \quad [1]$$

212 where  $M$  is the number of neurons,  $p$  the connection probabili-  
 213 ty,  $d = \lceil pM \rceil$  the average degree of the network,  $\bar{m}$  the average  
 214 firing rate of the network and  $T$  the simulation duration. The  
 215 last term in Eq. (1) corresponds to the computational cost  
 216 of the procedural connectivity at each spike, which is indeed  
 217 negligible with respect to other terms, as explained before.

218 Note that such computational costs depend in particular  
 219 on the intensity shape of the underlying point process model.  
 220 The linearity of the Hawkes processes makes it easy to derive,  
 221 whereas this can be much more cumbersome with other models  
 222 such as stochastic LIF, which needs to compute the distribution  
 223 of the time at which the threshold is reached.

224 The maximal memory cost of the procedural connectivity,  
 225 without the spike times storage, is of the order of  $\mathcal{O}(d\omega) =$   
 226  $\mathcal{O}(pM\omega)$ , with  $\omega$  the number of bits necessary for representing  
 227 the index of a post-synaptic neuron.

228 The memory cost of a static storage of the whole graph is  
 229 of the order of  $\mathcal{O}(dM\omega) = \mathcal{O}(pM^2\omega)$ . We do not include in  
 230 this the memory costs for the storage of each spike of each  
 231 neuron. However, this cost is the same whatever the method  
 232 and it is of the order of  $MT\bar{m}\epsilon$ , where  $\epsilon$  is the number of bits  
 233 necessary to represent a spike, which depends on the numerical  
 234 precision with which time is recorded. If  $d$  is thought to be a  
 235 fixed parameter, the memory cost of our complete algorithm  
 236 with procedural connectivity is thus

$$237 \quad \mathcal{O}(d\omega + MT\bar{m}\epsilon) \quad [2]$$

238 Conversely, the use of a static storage of the network is  
 239  $\mathcal{O}(dM\omega + MT\bar{m}\epsilon)$ . Note however that depending on what  
 240 the program needs to return, we might not want to have the  
 241 whole set of points but only summary statistics such as firing  
 242 rates that will cost in memory much less than  $\mathcal{O}(MT\bar{m}\epsilon)$ .

243 **Choice of brain scale parameters.** Because of the precision of  
 244 the actual measurements and the brain region and neuron

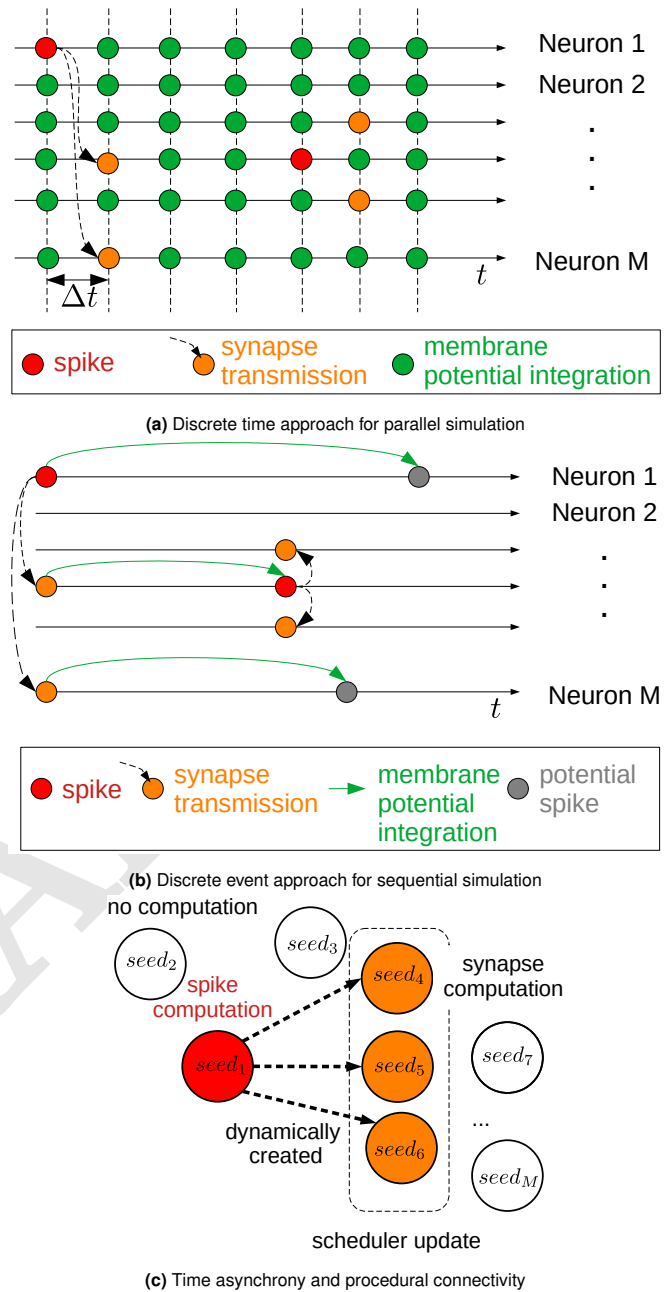

Fig. 1. Neuronal computations in time and in the network

245 variability, it is difficult to estimate quantitatively both physi-  
 246 ological (number of synapses per neuron, etc.) and dynamic  
 247 parameters (average firing rate, etc.) of neuronal networks  
 248 in primates (6) and humans (36). Only rough estimates are  
 249 available. The human brain being the more computationally  
 250 intensive, we estimate here its main parameters for simulation.  
 251 Our goal is indeed to show the algorithm scalability to simulate  
 252 large networks with such parameters.

253 To our knowledge, the best documented region of the human  
 254 brain is the (neo)cortex. Based on the structural statistics  
 255 (number of neurons and synaptic connections) of neuronal  
 256 networks in the (neo)cortex, we extrapolate here their repre-  
 257 sentative parameter values at brain scale.

258 The firing rate of a neuron in the brain can be estimated

259 by the limited resources at its disposal, especially glucose.  
 260 Measures of ATP consumption have shown (see (29)) that the  
 261 firing rate of a neuron in human neocortex can be estimated  
 262 around  $0.16Hz$ . Still based on ATP consumption, only 10% of  
 263 the neurons in the neocortex can be active at the same time.  
 264 So it seems coherent to choose an average of  $0.16Hz$ . These  
 265 values can be extrapolated to the whole brain\*, as follows.

The neocortex represents 80% of the volume of the brain (37) and consumes 44% of its energy (29). Considering that the energy consumed by the brain is proportional to the firing rate of the neurons, the power ratio then consists of

$$\frac{P_{cortex}}{P_{brain}} \sim \frac{V_{cortex}\bar{m}_{cortex}}{V_{brain}\bar{m}_{brain}},$$

266 with  $\bar{m}_{cortex}$  the mean firing rate of individual neurons in the  
 267 neocortex (resp. in the brain) and  $V_{cortex}$  the volume of the  
 268 neocortex (resp. in the brain). The average firing rate of  
 269 the brain then consists of  $\bar{m}_{brain} = 0.8 \times \frac{0.16}{0.44} = 0.29 Hz$  per  
 270 neuron.

271 This average firing rate should not be confused with the fact  
 272 that particular neurons can have a much larger firing rate.  
 273 Particularly, groups of neurons synchronize together for  
 274 achieving a particular cognitive task: this is the concept of  
 275 neuronal assemblies (38). In an assembly, neurons can usually  
 276 increase their rates to tens  $Hz$  (possibly  $50Hz$ ) over a short  
 277 duration. Therefore, we choose a firing rate in the brain where  
 278 most of the neurons have a firing rate of  $0.3Hz$  but some have  
 279 a much higher firing rate (up to  $50Hz$ ) using an heavy tailed  
 280 distribution, see Materials and Methods and Table 2.

281 The average number of synaptic connections in human  
 282 brains is hard to estimate and depends heavily on the neuron  
 283 types and brain regions. For example, in the brain, it is assumed  
 284 that the majority of neurons are cerebellum granule cells (39).  
 285 In (40), the number of synaptic connections to granule neurons  
 286 is estimated to an average of only 4 connections, matching those  
 287 observed anatomically. On the other hand, Purkinje neurons can  
 288 have up to 200,000 synapses on only one dendrite in the human  
 289 brain (39). The approximate number of synapses in the cortex is  
 290  $0.6 \times 10^{14}$  (41). Assuming that the volume of the cortex  
 291 represents around 80% of the volume of the brain, the number  
 292 of synapses in the brain is of order  $10^{14}$ . Considering that the  
 293 number of neurons in the human brain is of order  $10^{11}$  (36), we  
 294 find that the average number of synapses is about 1,000  
 295 synapses per neuron<sup>†</sup>. The synaptic connection probability  
 296 thus depends on the number of neurons  $M$ :  $p_M = \frac{1,000}{M}$ .

298 Finally, an action potential arriving on one pre-synaptic  
 299 neuron produces an Excitatory PostSynaptic Potential (EPSP),  
 300 or an Inhibitory PostSynaptic Potential (IPSP), in the postsynaptic  
 301 neuron. The duration of these postsynaptic potentials is about  
 302  $\tau = 20ms$  (39).

303 Therefore the parameters that we used in the simulation  
 304 are indicated in Table 1. Notice that these parameters are  
 305 generic and intuitive and can be taken easily into account in  
 306 further studies, either at a biological or at theoretical model  
 307 level.

\* This calculus can be found on AI impact project webpage: <https://aiimpacts.org/rate-of-neuron-firing/> (lastly verified: 02/09/2021)

† Calculus on AI impact project webpage: <https://aiimpacts.org/scale-of-the-human-brain/> (lastly verified: 02/09/2021).

|                                 |                                  |
|---------------------------------|----------------------------------|
| Simulation duration             | $T = 5s$                         |
| Mean firing rate                | $\bar{m} = 0.3Hz$                |
| Number of neurons simulated     | $M = \{10^5, 10^6, 10^7, 10^8\}$ |
| Synaptic connection probability | $p_M = 1000/M$                   |
| Postsynaptic duration           | $\tau = 20ms$                    |

Table 1. Neuronal network parameters at human brain scale level.

308 **Software and hardware configurations.** The simulations have  
 309 been run on a Symmetric shared Memory multiProcessor  
 310 (SMP) computer equipped with Intel CascadeLake@2.6GHz  
 311 processors<sup>‡</sup>. This kind of computer is used here to have access  
 312 to larger memory capacities. At computational level, only  
 313 one processor was used for the simulations. For small sizes  
 314 of networks requiring small amounts of memory (*cf.* Figure  
 315 3b), *e.g.* a network of  $10^6$  neurons with a total of  $10^9$  synaptic  
 316 connections, this computer is equivalent to a simple desktop  
 317 computer. The simulation of such networks takes only 25  
 318 minutes for each biological second. This is of the order of  
 319 the  $4.13 \times 10^6$  neurons and  $24.2 \times 10^9$  synapses simulated on  
 320 GPUs (24), which takes about 15 minutes for each biological  
 321 second. This GPU-based simulation was already running up  
 322 to 35% faster than on 1024 supercomputer nodes (one rack of  
 323 an IBM Blue Gene/Q) (42). Our simulation only requires a  
 324 single usual processor and no GPU.

325 The implementation of the algorithm is written in C++  
 326 (2011) programming language and compiled using g++ 9.3.0.

327 **Firing rate at network level.** Table 2 presents classical elemen-  
 328 tary statistics on the simulated firing rates, whereas Figure 2  
 329 presents the corresponding densities. As one can see in Section  
 330 Material and Methods, the system is initialized with a lot of  
 331 neurons whose spontaneous spiking activity is null. The sys-  
 332 tem needs to warm up to have almost all neurons spiking. This  
 333 explains why the density at  $T = 5s$  is still rippled whereas, at  
 334  $T = 50s$ , it looks much smoother. This last case corresponds  
 335 basically to the stationary version of the process. Indeed, as  
 336 explained in Section Material and Methods, the parameters  
 337 of the Hawkes model (in particular the spontaneous spiking  
 338 activity) have been fixed to achieve a certain stationary distri-  
 339 bution of the firing rates (with mean  $0.3Hz$ ), which is heavy  
 340 tailed to achieve records as large as  $50 Hz$ . As one can see  
 341 (even if at  $T = 5s$  the system is not warmed up yet with a  
 342 lot of non spiking neurons), one can still achieve the desired  
 343 average firing rate and extremal values. These basic statistics  
 344 are not varying a lot with  $T$  (see Table 2). Note that the  
 345 density plots are roughly the same for all configurations: with  
 346 ripples at  $T = 5s$  and smooth curve at  $T = 50s$ .

347 Our approach is particularly adapted to simulate precisely  
 348 and efficiently a huge disparity in frequency distributions.  
 349 Indeed, our simulation algorithm (22) allows focusing efficiently  
 350 the computing resources on highly spiking neurons without  
 351 computing anything for almost silent neurons (*cf.* Figures 1a  
 352 and 1b). The last advantage of our approach is to be able to  
 353 store time stamps with a precision of  $10^{-15}s$ .

354 **Execution times and memory usage.** The simulation execu-  
 355 tion times are presented in Figure 3a for different sizes of

<sup>‡</sup> We used v100l and v100xl partitions on Joliot-Curie supercomputer at TGCC as a Fenix Infra-structure resource. Each node of v100l and v100xl has Intel CascadeLake@2.6GHz processors. A node on v100l is a dual-socket one with 2x18 cores, each core having a memory of 10 GBytes, so the total amount of available memory is 360 GBytes. A node on v100xl is a quad-socket one with 4x18 cores, each core having a memory of 41.5 GBytes, so the total amount of available memory is 3 TBytes.

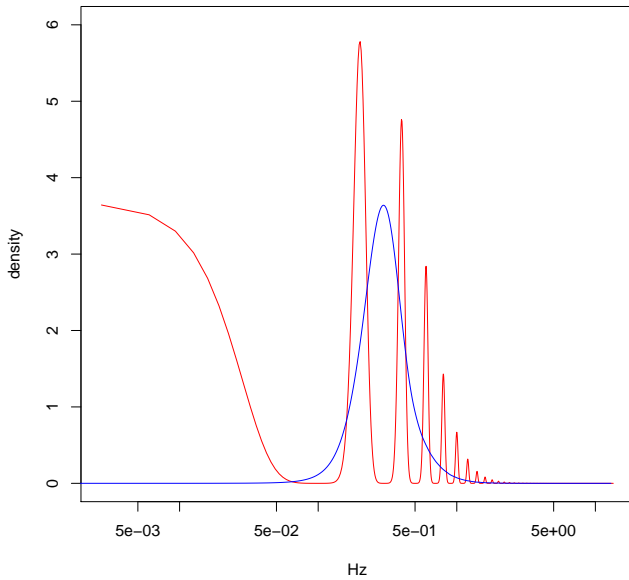

**Fig. 2.** Densities (on a logarithmic scale) of the simulated firing rates in the network with  $M = 10^6$  neurons and  $d = 1000$  post-synaptic connections in average. In red, for  $T = 5$  s and in blue for  $T = 50$  s. These densities are obtained with a Gaussian kernel estimator with bandwidth 0.02.

average number of post-synaptic connections per neuron has few impact on the memory. Indeed, within the network, only the post-synaptic connections receiving spikes are dynamically generated.

## Material and Methods

**Model.** For a set of  $M$  neurons, we first design the graph of interaction by saying that neuron  $j$  influences neuron  $i$  if a Bernoulli variable  $Z_{j \rightarrow i}$  of parameter  $p$  is non zero. The resulting network is an Erdős-Rényii graph.

Once the network is fixed, we design the spike apparition thanks to a Hawkes process, that is a point process whose intensity is given by

$$\lambda^i(t) = \nu_i + \sum_{j=1}^M \int_0^t h_{j \rightarrow i}(t - \tau) dN_{\tau}^j,$$

with  $dN^j$  the point measure associated to neuron  $j$ . In this formula,  $\nu_i$  represents the spontaneous firing rate of the neuron  $i$  if the other neurons do not fire, whereas  $h_{j \rightarrow i}$  is the interaction function, that is  $h_{j \rightarrow i}(u)$  is the increase (if positive) or decrease (if negative) that the firing rate of neuron  $i$  suffers due to a spike on  $j$ , which happens  $u$  seconds before.

We are interested in a particular case of the Hawkes process where all the interaction functions are always the same when they are non null. More precisely, we set the interaction function

$$h_{j \rightarrow i} = Z_{j \rightarrow i} \theta h,$$

where  $h$  is a fixed positive interaction function of integral 1,  $\theta$  is a tuning parameter that we need to calibrate to avoid explosion of the process. We also set  $h_{i \rightarrow i} = 0$  (no self interaction). We take  $h = 50 \mathbf{1}_{[0,0.02]}$ : the interaction function is a constant and non zero only on a small interval of length 20ms, which corresponds to typical Post Synaptic Potentials in the brain.

Let us denote  $H_{j \rightarrow i} = \int_0^{+\infty} h_{j \rightarrow i}(t) dt$  and  $H = (H_{j \rightarrow i})_{i,j=1,\dots,M}$  is the corresponding matrix (line  $i$  corresponds to a triggered neuron, column  $j$  to a triggering neuron).

Note in particular that in this model, there are only excitatory neurons : if in the brain, there are inhibitory neurons, this will only reduce the number of points without changing the complexity. Moreover when all the interaction functions are non negative, we can easily understand the explosion condition.

Indeed, this Hawkes process explodes, that is, it produces an exponentially increasing number of point per unit of time (see (43)) if the spectral radius of  $H$  is larger than 1.

If (*Condition Stat*) the spectral radius is strictly smaller than 1 (44), then a stationary version exists and the corresponding vector of mean firing rates  $m = (m_i)_{i=1,\dots,M}$  is given by

$$m = (I - H)^{-1} \nu. \quad [3]$$

Note also that if we start the simulation without points before 0 in (*Condition Stat*), the process is not stricto sensu stationary but it will converge to an equilibrium given by the stationary state (ergodic theorem) and that the number of points that will be produced is always smaller than the stationary version.

In the present case we want (i) to prevent explosion and (ii) to reach a certain vector  $m$  which is biologically realistic (average around 0.3 Hz, records around 50 Hz). Both of these calibrations can be done mathematically beforehand in the Hawkes model : we can guarantee the behavior of the whole

neural networks and different numbers of synaptic connections (called children). The experimental execution times obtained are in agreement with Eq. (1) which predicts, for instance,  $O(10^{12})$  operations for  $M = 10^7$  and  $d = 10^3$ . The curves are almost linear (with slopes around 1.1) with respect to the number of neurons, for different numbers of synaptic connections.

The total amount of memory used is displayed in Figure 3b. They are in agreement with the procedural memory complexity of Eq. (2) and also almost linear (with slopes slightly below 1). Note in particular that for  $M = 10^7$ ,  $d = 10^3$ ,  $\omega = 32$  and  $\epsilon = 64$  (leading to a  $10^{-15}$  precision in time), the memory cost predicted by Eq. (2) is  $O(10^{11})$  for the static implementation, whereas it is  $O(10^9)$  for the procedural connectivity implementation. Besides notice that, as expected, increasing the

| M   | d    | Average freq. | Freq. min. | Freq. max.   | Freq. std.    | Percentage of non spiking neuron |
|-----|------|---------------|------------|--------------|---------------|----------------------------------|
| 1e5 | 250  | 0.279 (0.279) | 0 (0)      | 14 (13.94)   | 0.315 (0.222) | 31.2 (0.01)                      |
| 1e5 | 500  | 0.334 (0.333) | 0 (0.02)   | 6.6 (5.76)   | 0.328 (0.218) | 23.5 (0)                         |
| 1e5 | 1000 | 0.399 (0.398) | 0 (0.04)   | 10.4 (11.64) | 0.345 (0.220) | 16.9 (0)                         |
| 1e6 | 250  | 0.267 (0.267) | 0 (0)      | 19.2 (20.84) | 0.308 (0.217) | 33 (0.01)                        |
| 1e6 | 500  | 0.322 (0.324) | 0 (0)      | 38.4 (39.38) | 0.329 (0.225) | 25.1 (0.00)                      |
| 1e6 | 1000 | 0.383 (0.387) | 0 (0.02)   | 13.4 (12.9)  | 0.344 (0.223) | 18.5 (0)                         |
| 5e6 | 250  | 0.26 (0.261)  | 0 (0)      | 27.4 (28.5)  | 0.307 (0.217) | 34.1 (0.02)                      |
| 5e6 | 500  | 0.315 (0.316) | 0 (0)      | 34.2 (34.1)  | 0.324 (0.220) | 26 (0.00)                        |
| 5e6 | 1000 | 0.377         | 0          | 19.8         | 0.342         | 19                               |
| 1e7 | 250  | 0.258 (0.259) | 0 (0)      | 23.2 (21.62) | 0.306 (0.217) | 34.4 (0.02)                      |
| 1e7 | 500  | 0.311         | 0          | 21.6         | 0.322         | 26.4                             |
| 1e7 | 1000 | 0.374         | 0          | 21.8         | 0.342         | 19.3                             |
| 5e7 | 250  | 0.253         | 0          | 38.2         | 0.304         | 35.4                             |
| 5e7 | 500  | 0.305         | 0          | 50.6         | 0.321         | 27.2                             |
| 1e8 | 250  | 0.251         | 0          | 46.2         | 0.303         | 35.7                             |

**Table 2.** Firing rates elementary statistics obtained by simulation for different sizes of neural networks and different numbers of synaptic connections and  $T = 5$  s. The number between parentheses displays the results at  $T = 50$  s for the less complex simulations

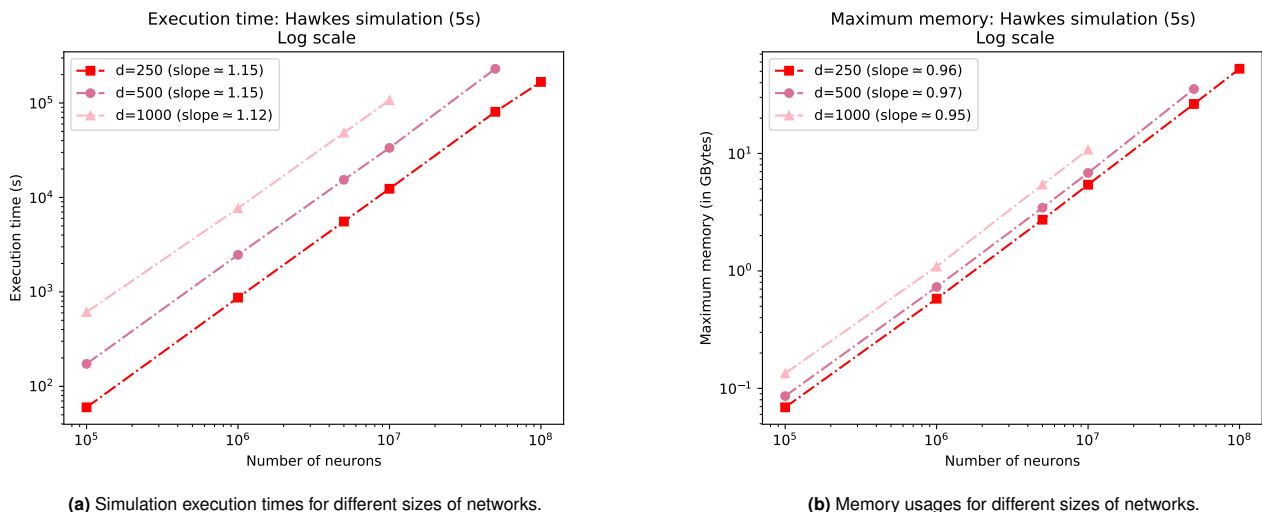

Fig. 3. Simulation execution times (3a) and memory usage (3b) for different sizes of networks.

418 system even before performing the simulation, whereas this  
419 might be much more intricate for other models such as LIF.

420 **Choice of  $\theta$  or how to avoid explosion.** Note that  $H = \theta Z$ ,  
421 with  $Z = (Z_{j \rightarrow i})_{i,j=1,\dots,M}$ . So if we can compute the largest  
422 eigenvalue of  $Z$  or an upper bound, we can decide how to  
423 choose  $\theta$ .

We can use Gershgorin circles (45) to say that any complex  
eigenvalue  $\lambda$  of  $Z$  satisfies (because the diagonal is null),

$$|\lambda| \leq \max_{i=1,\dots,M} \sum_{j \neq i} Z_{j \rightarrow i}.$$

424 Therefore the spectral radius is upper bounded by  
425  $\max_{i=1,\dots,M} B_i$ , where  $B_i = \sum_{j \neq i} Z_{j \rightarrow i}$ . This random quantity  
426 can be computed for small networks but it is clearly too  
427 intensive in our setting: indeed, with the procedural connectivity  
428 implementation, it is always easy to access the children  
429  $\ell$  of a given  $i$ , i.e. such that  $i \rightarrow \ell$  is in the graph, but we need  
430 to look at all the neurons in the graphs to find out the set of  
431 parents  $j$  of  $i$ , i.e. such that  $j \rightarrow i$  is in the graph. However,  
432 probabilistic estimates might be computed mathematically.  
433 Indeed  $B_i$  is just a sum of i.i.d. Bernoulli variables. So we  
434 can apply Bernstein's inequality (46). This leads to, for all  
435 positive  $x$ ,

$$\begin{aligned} &\forall i = 1, \dots, M, \\ &\mathbb{P}(B_i \geq (M-1)p + \sqrt{2(M-1)p(1-p)x} + x/3) \leq e^{-x}, \end{aligned}$$

and, by union bound, for the maximum

$$\mathbb{P}(\max_{i=1,\dots,M} B_i \geq (M-1)p + \sqrt{2(M-1)p(1-p)x} + x/3) \leq M e^{-x}.$$

Therefore let us fix a level  $\alpha$ , say 1%, and take  $x = \log(M) + \log(1/\alpha)$  in the previous equation. We obtain that with probability larger than  $1 - \alpha$ , the spectral radius of  $Z$  is upper bounded

$$\rho_{\max} = (M-1)p + \xi_\alpha$$

with

$$\xi_\alpha = \sqrt{2(M-1)p(1-p)[\log(M) + \log(1/\alpha)]} + [\log(M) + \log(1/\alpha)]/3$$

Note that  $\rho_{\max}$  is roughly  $(M-1)p$ , which is the largest  
eigenvalue of  $\mathbb{E}(Z)$ . Finally it means that if we take  $\theta <$   
 $1/\rho_{\max}$ , the process will not explode with probability larger  
than  $1 - \alpha$ . In practice, to ensure a strong enough interaction,  
we take  $\theta = 0.9\rho_{\max}^{-1}$ .

443 **Choice of  $\nu_i$  or how to constraint the distribution of the mean**  
444 **firing rates.** The first step consists in deciding for a target  
445 distribution for the  $m_i$ . We have chosen to pick the  $m_i$ 's  
446 independently as  $0.1X$  where  $X$  is the absolute value of a  
447 student variable with mean 3 and 4 degrees of freedom. The  
448 choice of the student variable was driven by the wish of having  
449 a moderate heavy tail, which will ensure records around 50  
450 Hz and a mean around 0.3Hz.

The problem is that the  $m_i$ 's are not parameters of the  
model, so we need to understand how to tune  $\nu_i$  to get such  
 $m_i$ 's. Note that by inverting Eq. (3), we get that

$$(I - H)m = \nu$$

that is for all  $i$

$$\nu_i = m_i - \theta \sum_{j \neq i} m_j Z_{j \rightarrow i},$$

451 which is very intuitive (47). Indeed the spontaneous rate that  
452 we need to put is the mean firing rate  $m_i$  minus what can be  
453 explained with the parents of  $i$ .

454 So in theory, the Hawkes model is very easy to tune for pre-  
455 scribed firing rates since there is a linear relationship between  
456 both. However, and for the same reasons as before, it might  
457 be too computationally intensive to compute this explicitly.

458 One possible way is to again use concentration inequalities,  
459 but this time on  $\sum_{j \neq i} m_j Z_{j \rightarrow i}$  and not on  $B_i$ . However we  
460 decided to do something simpler, which works well (as seen in  
461 Figure 2).

462 Indeed  $\sum_{j \neq i} m_j Z_{j \rightarrow i}$  is a sum of about  $(M - 1)p \simeq 1000$   
463 i.i.d variables with mean  $\bar{m} = 0.3\text{Hz}$ . Hence it should be close  
464 to  $\bar{m}B_i$ . With the previous computations, we know already  
465 that  $\nu_i$  should therefore be larger than  $m_i - \theta\rho_{\max}\bar{m}$ .

With the previous choice of  $\theta = 0.9\rho_{\max}^{-1}$ , we have chosen to  
take the positive part for the  $\nu_i$ 's in the simulation, that is :

$$\nu_i = \max(m_i - 0.9\bar{m}, 0).$$

466 Therefore  $\nu_i$  remains positive or null, which guarantees that  
467 the Hawkes process stays linear. However, this also means  
468 that a non negligible portion of the neurons start with a null  
469 spontaneous firing rate, which explains the ripples of Figure 2.

470 With this choice, we cannot hope to have exactly the same  
471 distribution as the desired  $m_i$ 's, but it conserves the same  
472 heavy tail and roughly the same mean firing rate as the one  
473 we wanted, as one can see on Table 2.

## 474 Discussion

475 Thanks to time asynchrony, we propose a new scalable algo-  
476 rithm to the simulate spiking activity of neuronal networks.  
477 We are able to generate roughly the same firing pattern as a  
478 real brain for a range between  $10^5$  and  $10^8$  neurons, in a few  
479 minutes on a single processor, most parameters being tuned  
480 thanks to general considerations inferred from the literature.  
481 Corresponding computational and memory complexities are  
482 shown to be both linear.

483 At simulation level, whereas usual simulations are based  
484 on the continuous variation of the electrical potentials of LIF  
485 neurons, point processes lead to much more efficient simula-  
486 tions. In particular, instead of computing the small continuous  
487 variations for all neurons, only discrete spikes and their in-  
488 teractions are simulated in the network. Between two spikes  
489 no computations are done. Point processes also lead to time  
490 asynchrony (two spikes cannot occur at the same time in the  
491 network), which is a fundamental hypothesis for the algorithm  
492 to work.

493 Combining the time asynchrony hypothesis with procedural  
494 connectivity drastically reduces the memory consumption and  
495 also, for the same network activity, reduces the computations  
496 per spikes (*cf.* Figures 1a and 1b). In particular, complexities  
497 (both theoretical and concrete) can be computed and proved  
498 to be almost linear in the number of neurons, when Hawkes  
499 processes are generated, leading to simulation scalability of  
500 the whole approach without precision loss.

501 Both modeling and simulation results open many research  
502 perspectives. We are currently developing new discrete event  
503 algorithms that are able to simulate the spiking activity of  
504 neurons embedded in potentially infinite neuronal networks  
505 (48). This paves the path for simulation of parts of the brain  
506 as an open physical system.

507 Furthermore, the minimal number of computations and  
508 memory storage obtained here open new exciting perspectives  
509 with respect to massive neuromorphic computers, by improving  
510 the energy saving consumption of neuromorphic components  
511 (49).

512 Finally, if we have proved that the simulation is doable,  
513 the point process model used here can be calibrated further  
514 on real data, by incorporating inhibition and more variability  
515 in the interaction functions. Also, this model can be used for  
516 reconstructing the functional connectivity of experimentally  
517 recorded neurons (15, 47) to have access to more realistic

interaction functions. Besides, as only few computing resources  
(one single processor) is used with a minimal memory amount,  
this opens new possibilities to run in parallel many independent  
replications of stochastic simulations of large networks. This  
is particularly interesting for calibrating models based on real  
data collections.

**ACKNOWLEDGMENTS.** This work is part of the project Hyper-  
Brain from Human Brain Project (HBP) EBRAINS EU initiative.  
The simulations were run on Fenix Infrastructure resources, which  
are partially funded from the European Union's Horizon 2020 re-  
search and innovation program through the ICEI project under the  
grant agreement No. 800858. Our research was supported by the  
French government, through CNRS, the UCA<sup>Jedi</sup> and 3IA Côte  
d'Azur Investissements d'Avenir managed by the National Research  
Agency (ANR-15- IDEX-01 and ANR-19-P3IA-0002), directly by  
the ANR project ChaMaNe (ANR-19-CE40-0024-02) and by the in-  
terdisciplinary Institute for Modeling in Neuroscience and Cognition  
(NeuroMod) of the Université Côte d'Azur.

1. K Amunts, et al., The human brain project—synergy between neuroscience, computing, infor-  
matics, and brain-inspired technologies. *PLoS biology* **17**, e3000344 (2019).
2. MR Dando, Japan's brain/minds project (2020).
3. W Koroshetz, et al., The state of the nih brain initiative. *J. Neurosci.* **38**, 6427–6438 (2018).
4. RR Netz, WA Eaton, Estimating computational limits on theoretical descriptions of biological  
cells. *PNAS* **118** (2021).
5. E Gal, et al., Rich cell-type-specific network topology in neocortical microcircuitry.  
*Nat. Neurosci.* **20**, 1004–1013 (2017).
6. S Herculano-Houzel, CE Collins, P Wong, JH Kaas, Cellular scaling rules for primate brains.  
*Proc. Natl. Acad. Sci.* **104**, 3562–3567 (2007).
7. DA McCormick, Y Shu, Y Yu, Hodgkin and huxley model—still standing? *Nature* **445**, E1–E2  
(2007).
8. J Guckenheimer, RA Oliva, Chaos in the hodgkin–huxley model. *SIAM J. on Appl. Dyn. Syst.*  
**1**, 105–114 (2002).
9. L Lapicque, Recherches quantitatives sur l'excitation électrique des nerfs traitée comme une  
polarization. *J. Physiol. Pathology* **9**, 620–635 (1907).
10. H Yamaura, J Igarashi, T Yamazaki, Simulation of a human-scale cerebellar network model on  
the k computer. *Front. neuroinformatics* **14**, 16 (2020).
11. RF Fox, Stochastic versions of the hodgkin-huxley equations. *Biophys. journal* **72**, 2068–  
2074 (1997).
12. AA Lazar, EA Pnevmatikakis, Reconstruction of sensory stimuli encoded with integrate-  
and-fire neurons with random thresholds. *EURASIP J. on Adv. Signal Process.* **2009**, 1–14  
(2009).
13. W Truccolo, UT Eden, MR Fellows, JP Donoghue, EN Brown, A point process framework  
for relating neural spiking activity to spiking history, neural ensemble, and extrinsic covariate  
effects. *J. Neurophysiol.* **93**, 1074–1089 (2005).
14. EN Brown, R Barbieri, V Ventura, RE Kass, L Frank, The time-rescaling theorem and its  
application to neural spike train data analysis. *Neural Comput.* **14**, 325–346 (2002).
15. P Reynaud-Bouret, V Rivoirard, F Grammont, C Tuleau-Malot, Goodness-of-fit tests and non-  
parametric adaptive estimation for spike train analysis. *The J. Math. Neurosci.* **4**, 3 (2014).
16. J Pillow, et al., Spatio-temporal correlations and visual signalling in a complete neuronal  
population. *Nature* **454**, 995–999 (2008).
17. C Pouzat, A Chaffiol, Automatic spike train analysis and report generation. an implementation  
with r, r2html and star. *J. Neurosci. Methods* **181**, 119–144 (2009).
18. A Galves, E Löcherbach, Infinite systems of interacting chains with memory of variable  
length—a stochastic model for biological neural nets. *J. Stat. Phys.* **151**, 896–921 (2013).
19. L Sacerdote, MT Giraudo, *Stochastic Biomathematical Models*. (Lecture Notes in Mathemat-  
ics, Springer) Vol. 2058, pp. 99–148 (2013).
20. P Brémaud, *Point processes and queues*. (Springer-Verlag, New York-Berlin), (1981) Martin-  
gale dynamics, Springer Series in Statistics.
21. C Mascart, A Muzy, P Reynaud-bouret, Efficient simulation of sparse graphs of point pro-  
cesses (2020).
22. A Muzy, Exploiting activity for the modeling and simulation of dynamics and learning pro-  
cesses in hierarchical (neurocognitive) systems. *Comput. Sci. Eng.* **21**, 84–93 (2019).
23. Grazieschi, Paolo, et al., Network of interacting neurons with random synaptic weights.  
*ESAIM: ProcS* **65**, 445–475 (2019).
24. JC Knight, T Nowotny, Larger gpu-accelerated brain simulations with procedural connectivity.  
*Nat. Comput. Sci.* **1**, 136–142 (2021).
25. A Muzy, BP Zeigler, F Grammont, Iterative specification as a modeling and simulation formal-  
ism for i/o general systems. *IEEE Syst. J.* **12**, 2982–2993 (2017).
26. R Brette, et al., Simulation of networks of spiking neurons: a review of tools and strategies.  
*J. computational neuroscience* **23**, 349–398 (2007).
27. M Rudolph, A Destexhe, Analytical integrate-and-fire neuron models with conductance-based  
dynamics for event-driven simulation strategies. *Neural computation* **18**, 2146–2210 (2006).
28. JD Toublou, OD Faugeras, A markovian event-based framework for stochastic spiking neural  
networks. *J. computational neuroscience* **31**, 485–507 (2011).
29. P Lennie, The cost of cortical computation. *Curr. Biol.* **13**, 493–497 (2003).
30. A Duarte, A Galves, E Löcherbach, G Ost, Estimating the interaction graph of stochastic  
neural dynamics. *Bernoulli* **25**, 771–792 (2019).
31. P Jahn, RW Berg, Jr Hounsgaard, S Ditlevsen, Motoneuron membrane potentials follow a  
time inhomogeneous jump diffusion process. *J. Comput. Neurosci.* **31**, 563–579 (2011).

- 597 32. MJ Cáceres, JA Carrillo, B Perthame, Analysis of nonlinear noisy integrate & fire neuron  
598 models: blow-up and steady states. *J. Math. Neurosci.* **1**, Art. 7, 33 (2011).
- 599 33. F Delarue, J Inglis, S Rubenthaler, E Tanré, Global solvability of a networked integrate-and-  
600 fire model of McKean-Vlasov type. *Ann. Appl. Probab.* **25**, 2096–2133 (2015).
- 601 34. V Didelez, Graphical models of markes point processes based on local independence.  
602 *J.R. Stat. Soc. B* **70**, 245–264 (2008).
- 603 35. C Tuleau-Malot, A Rouis, F Grammont, P Reynaud-Bouret, Multiple Tests Based on a  
604 Gaussian Approximation of the Unitary Events Method with Delayed Coincidence Count.  
605 *Neural Comput.* **26**, 1408–1454 (2014).
- 606 36. S Herculano-Houzel, R Lent, Isotropic fractionator: A simple, rapid method for the quantifica-  
607 tion of total cell and neuron numbers in the brain. *J. Neurosci.* **25**, 2518–2521 (2005).
- 608 37. H Stephan, H Frahm, G Baron, New and revised data on volumes of brain structures in  
609 insectivores and primates. *Folia primatologica* **35**, 1–29 (1981).
- 610 38. F Grammont, A Riehle, Spike synchronization and firing rate in a population of motor cortical  
611 neurons in relation to movement direction and reaction time. *Biol. cybernetics* **88**, 360–373  
612 (2003).
- 613 39. GM Shepherd, *The synaptic organization of the brain*. (Oxford university press), (2004).
- 614 40. A Litwin-Kumar, KD Harris, R Axel, H Sompolinsky, L Abbott, Optimal degrees of synaptic  
615 connectivity. *Neuron* **93**, 1153–1164.e7 (2017).
- 616 41. DA Drachman, Do we have brain to spare? *Neurology* **64**, 2004–2005 (2005).
- 617 42. MO Gewaltig, M Diesmann, Nest (neural simulation tool). *Scholarpedia* **2**, 1430 (2007).
- 618 43. S Delattre, N Fournier, M Hoffmann, Hawkes processes on large networks. *Ann. App. Probab.*  
619 **26**, 216 – 261 (2016).
- 620 44. AG Hawkes, D Oakes, A cluster process representation of a self-exciting process.  
621 *J. Appl. Probab.* **11**, 493–503 (1974).
- 622 45. R Varga, *Gershgorin and his circles*. (Springer-Verlag), (2004) Springer Series in Computa-  
623 tional Mathematics.
- 624 46. S Boucheron, G Lugosi, P Massart, *Concentration inequalities*. (Oxford University Press,  
625 Oxford), (2013) A nonasymptotic theory of independence, With a foreword by Michel Ledoux.
- 626 47. P Reynaud-Bouret, A Muzy, I Bethus, Towards a mathematical definition of functional con-  
627 nectivity. (2021).
- 628 48. TC Phi, A Muzy, P Reynaud-Bouret, Event-Scheduling Algorithms with Kalikow Decomposi-  
629 tion for Simulating Potentially Infinite Neuronal Networks. *SN Computer Science* **1** (2020).
- 630 49. LA Plana, et al., spinnlink: Fpga-based interconnect for the million-core spinnaker system.  
631 *IEEE Access* **8**, 84918–84928 (2020).

DRAFT



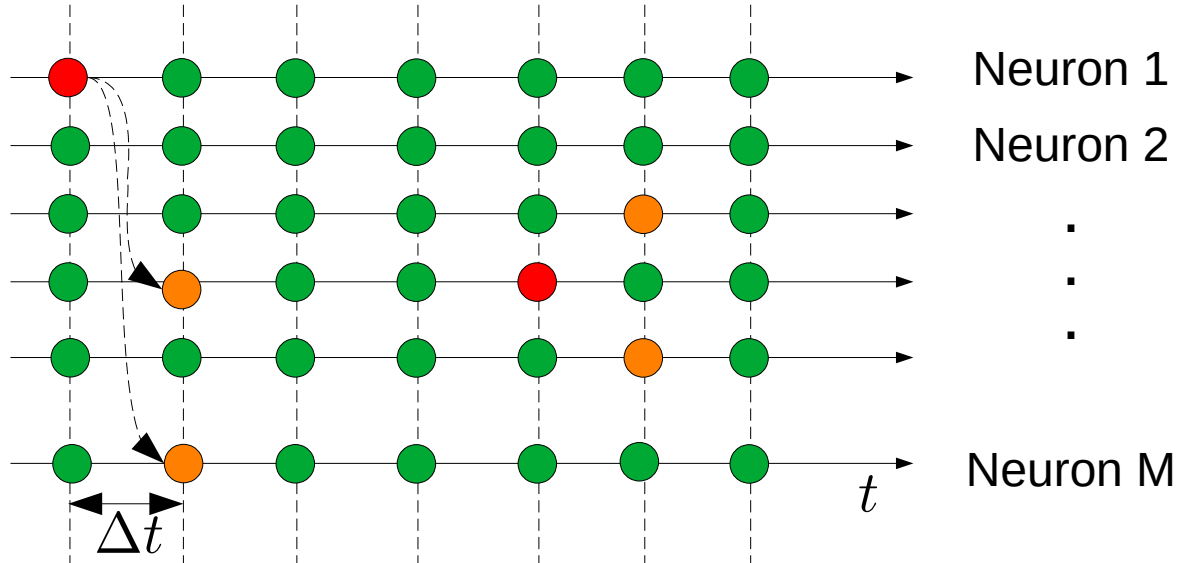

● spike

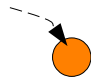

synapse  
transmission

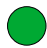

membrane  
potential integration

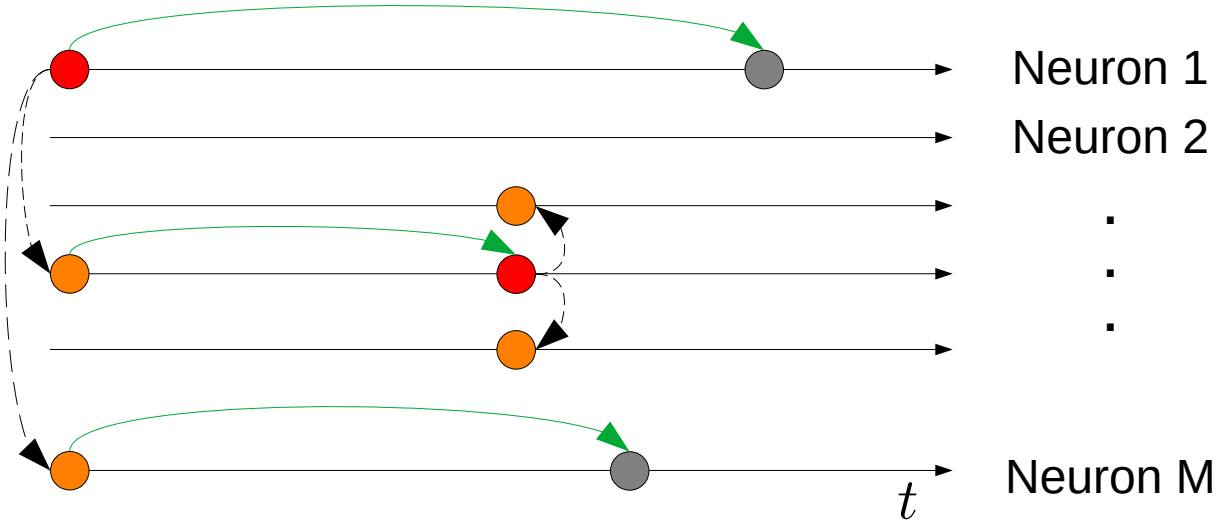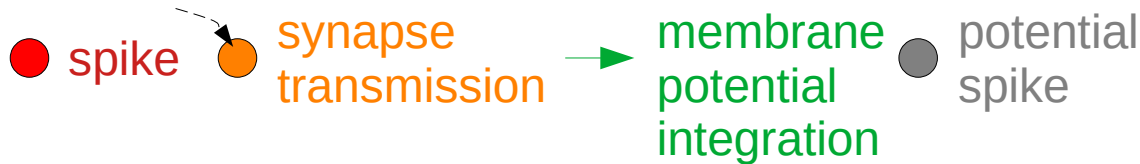

no computation

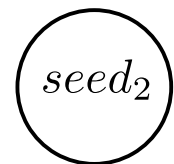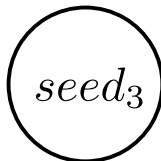

spike  
computation

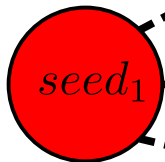

dynamically  
created

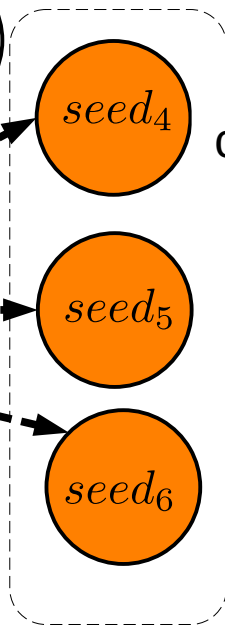

synapse  
computation

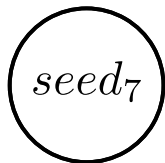

...

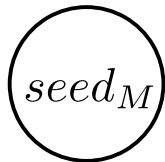

scheduler update

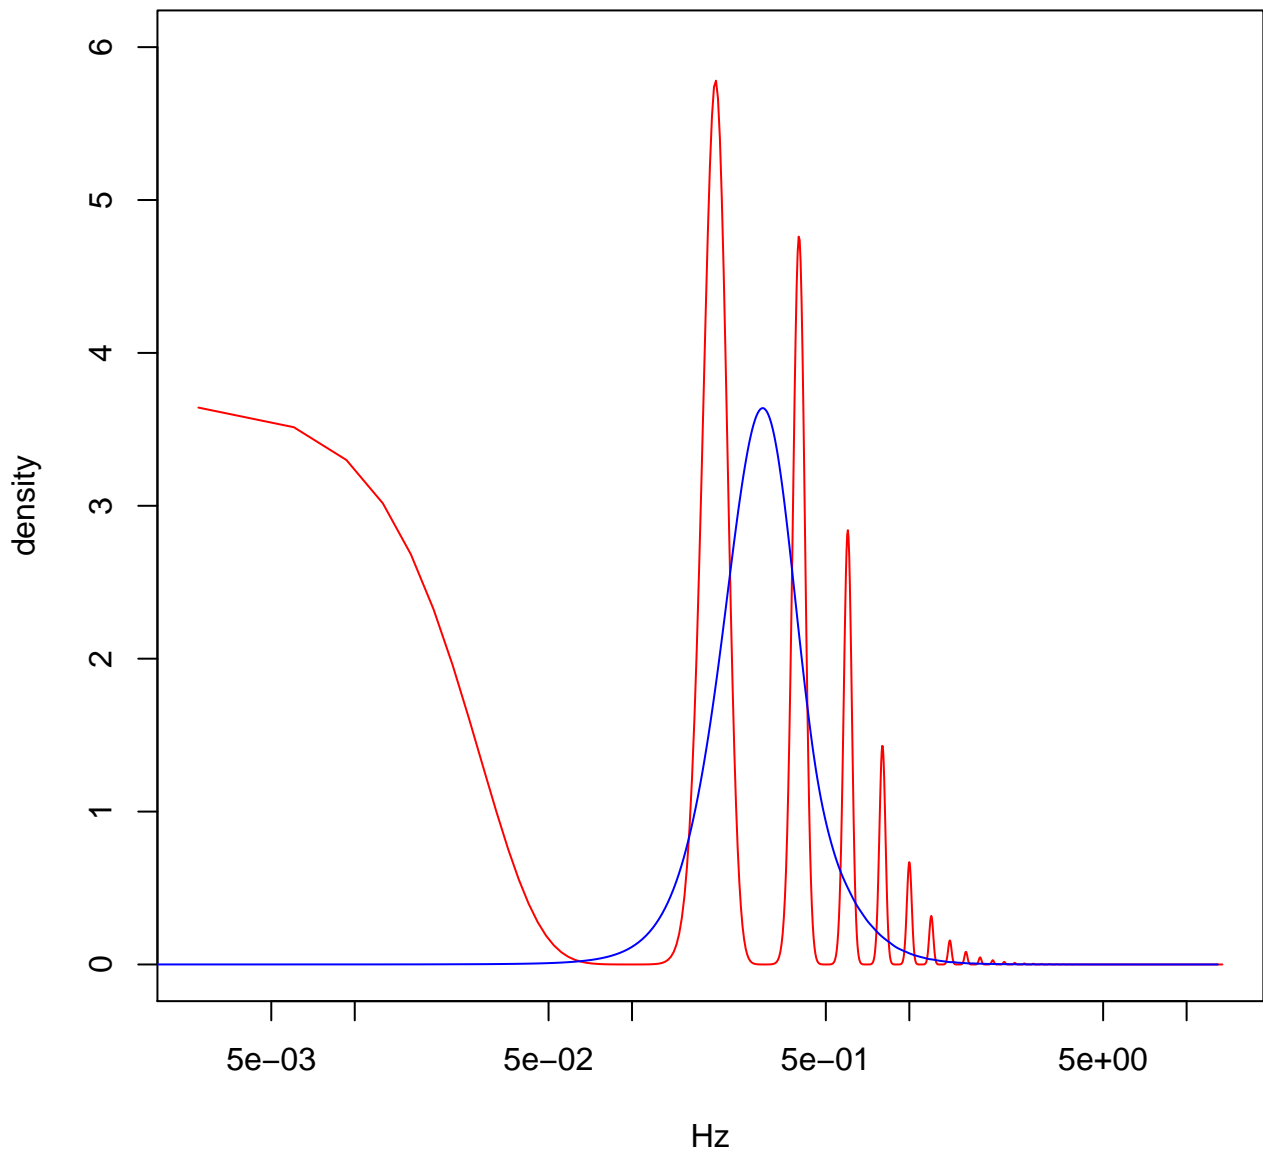

Maximum memory: Hawkes simulation (5s)  
Log scale

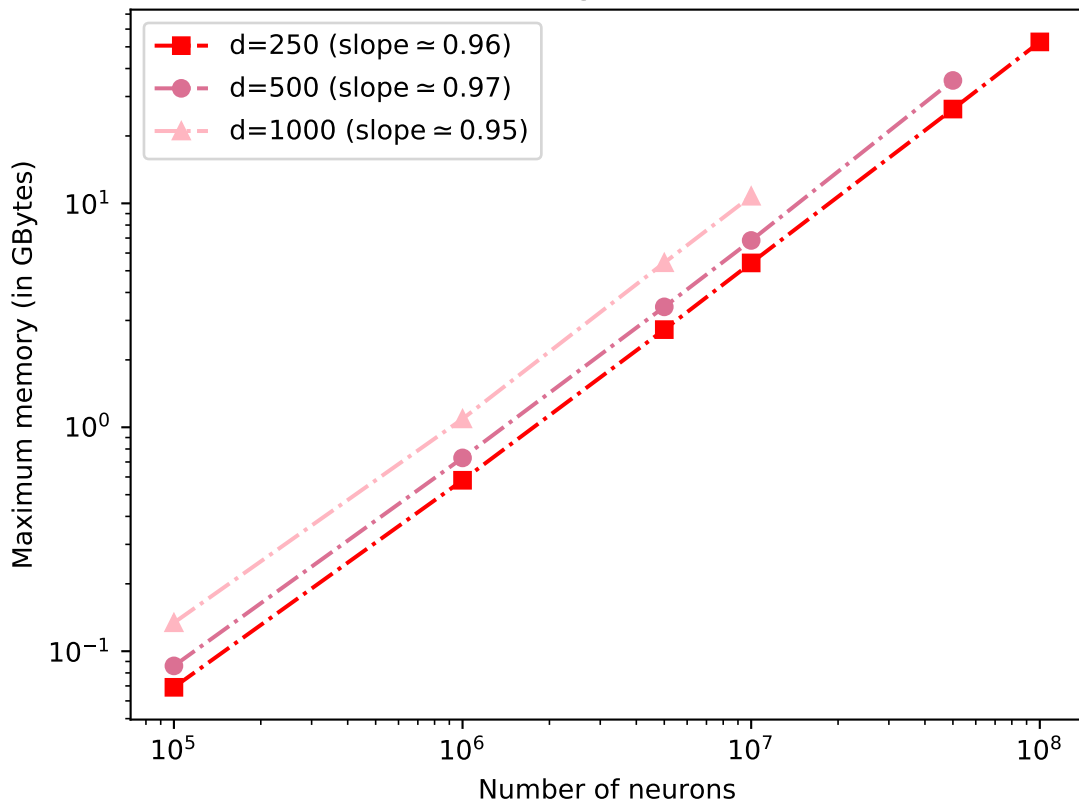

Execution time: Hawkes simulation (5s)  
Log scale

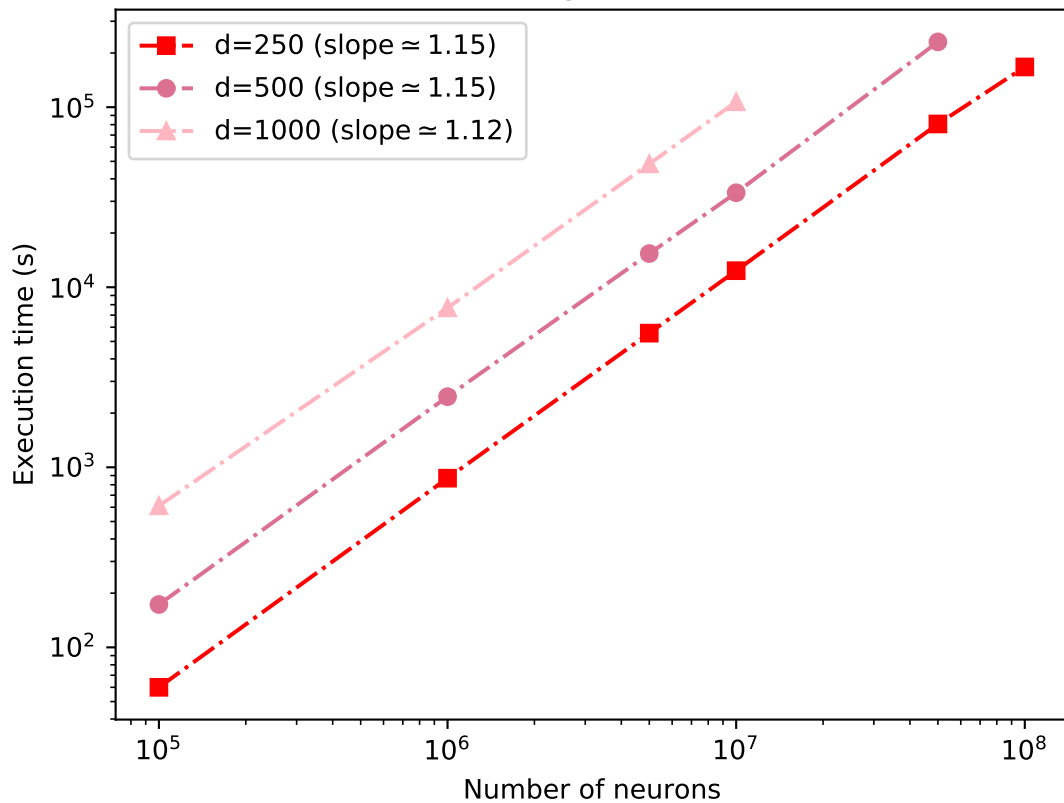

Source: http://biorxiv.org/content/10.1101/2021.06.12.448096v1.full.pdf
